# Supplementary material for: Experimental Therapy of HER2-Expressing Xenografts Using the Second-Generation HER2-Targeting Affibody Molecule 188Re-ZHER2:41071
Source: MDPI journal article supplement (doi:10.3390/pharmaceutics14051092), 2022-05-20
Supplement: s1 [file s1]

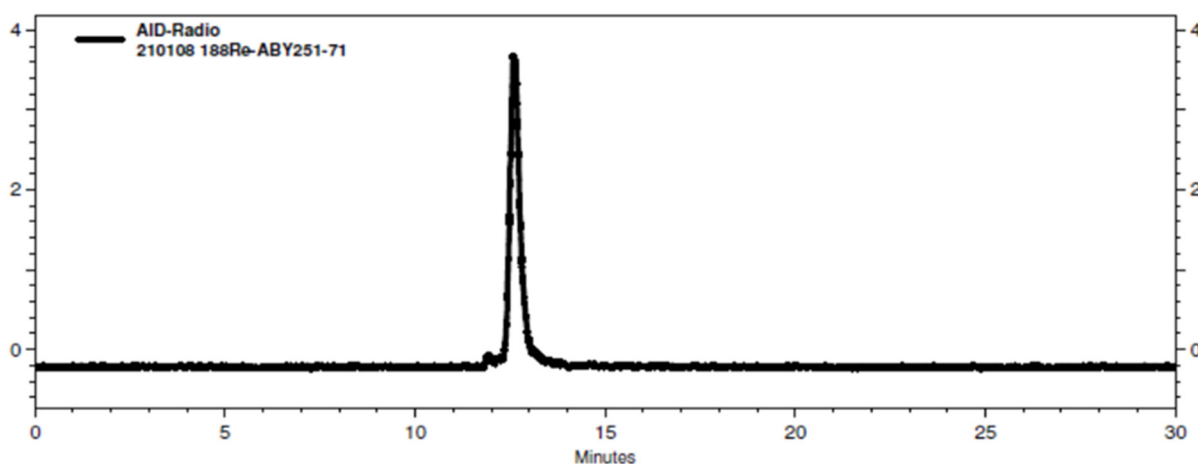

**Figure S1.** RadioHPLC chromatogram of  $^{188}\text{Re}$ -ZHER2:41071.

**Table S1.** Biodistribution of  $^{188}\text{Re}$ -ZHER2:41071 in normal NMRI mice.

|                  | Uptake, %ID/g |           |           |             |             |
|------------------|---------------|-----------|-----------|-------------|-------------|
|                  | 0.5 h         | 1 h       | 4 h       | 24 h        | 48 h        |
| blood            | 3.8±0.3       | 1.8±0.2   | 0.5±0.1   | 0.01±0.00   | 0.009±0.004 |
| heart            | 1.9±0.2       | 0.84±0.05 | 0.18±0.05 | 0.01±0.01   |             |
| salivary gland   | 1.9±0.2       | 0.9±0.1   | 0.34±0.09 | 0.01±0.00   |             |
| lung             | 4.5±0.7       | 2.1±0.3   | 0.6±0.2   | 0.05±0.02   |             |
| liver            | 3.6±0.5       | 2.4±0.3   | 1.0±0.3   | 0.20±0.04   | 0.15±0.03   |
| spleen           | 2.1±0.1       | 1.3±0.3   | 0.7±0.3   | 0.2±0.1     | 0.080±0.004 |
| pancreas         | 1.2±0.2       | 0.5±0.1   | 0.19±0.03 | 0.010±0.004 |             |
| kidney           | 57±7          | 29±9      | 3.1±0.8   | 0.5±0.1     | 0.17±0.02   |
| muscle           | 0.9±0.1       | 0.5±0.2   | 0.09±0.01 | 0.005±0.001 | 0.004±0.001 |
| bone             | 2.1±0.4       | 1.3±0.2   | 0.4±0.1   | 0.17±0.06   | 0.106±0.006 |
| brain            | 0.15±0.02     | 0.07±0.02 | 0.03±0.01 | 0.003±0.001 |             |
| stomach*         | 1.6±0.2       | 1.7±0.4   | 1.9±0.3   | 0.04±0.02   | 0.04±0.03   |
| small intestine* | 2.2±0.5       | 1.8±0.4   | 0.5±0.2   | 0.05±0.02   | 0.04±0.04   |
| large intestine* | 0.7±0.1       | 0.3±0.1   | 0.5±0.5   | 0.07±0.04   | 0.1±0.1     |
| caecum*          | 0.37±0.05     | 0.21±0.03 | 0.7±0.2   | 0.10±0.06   | 0.1±0.1     |
| carcass*         | 26±2          | 14±1      | 3.4±0.7   | 0.4±0.1     | 0.26±0.02   |

\* Data for stomach, small intestine, large intestine, and caecum are presented as %ID per whole sample with content. Data for carcass are presented for whole sample. The data are presented as average (n=4) values ± SD.

**Table S2.** Biodistribution of  $^{188}\text{Re}$ -ZHER2:41071 in BALB/C nu/nu mice bearing HER2-expressing SKOV-3 xenografts.

|                  | Uptake, %ID/g |             |             |             |             |
|------------------|---------------|-------------|-------------|-------------|-------------|
|                  | 1h            | 4 h         | 8h          | 24 h        | 48 h        |
| Blood            | 1.8±0.5       | 0.23 ±0.07  | 0.036±0.003 | 0.023±0.009 | 0.005±0.005 |
| heart            | 0.9±0.1       | 0.12 ±0.01  | 0.03 ±0.01  | 0.024±0.008 | 0.02±0.02   |
| salivary gland   | 1.3±0.3       | 0.4±0.4     | 0.04 ±0.01  | 0.025±0.007 | 0.03±0.01   |
| lung             | 3.0±0.6       | 0.5±0.1     | 0.13 ±0.02  | 0.079±0.007 | 0.07±0.03   |
| liver            | 3.4±0.5       | 1.4±0.1     | 0.6±0.1     | 0.31±0.04   | 0.23±0.04   |
| spleen           | 1.7±0.2       | 0.6±0.1     | 0.23 ±0.03  | 0.17±0.03   | 0.12±0.01   |
| pancreas         | 0.7±0.3       | 0.11 ±0.04  | 0.02 ±0.01  | 0.017±0.001 | 0.015±0.006 |
| kidney           | 38±2          | 4.8±0.4     | 2.4±0.4     | 1.1±0.2     | 0.5±0.1     |
| tumor            | 31±4          | 39±8        | 29±6        | 12±1        | 3.8±0.6     |
| muscle           | 0.5±0.1       | 0.06 ±0.02  | 0.02 ±0.01  | 0.016±0.008 | 0.006±0.002 |
| bone             | 1.6±0.4       | 0.34 ±0.04  | 0.20 ±0.04  | 0.18±0.03   | 0.18±0.06   |
| brain            | 0.07 ±0.02    | 0.015±0.004 | 0.01 ±0.01  | 0.003±0.001 | 0.004       |
| stomach*         | 0.8±0.2       | 0.3±0.2     | 0.02 ±0.01  | 0.05±0.04   | 0.0         |
| small intestine* | 1.2±0.3       | 0.3±0.2     | 0.07 ±0.01  | 0.034±0.005 | 0.018±0.007 |
| large intestine* | 0.3±0.1       | 0.26 ±0.06  | 0.09 ±0.04  | 0.2±0.2     | 0.04±0.02   |
| caecum*          | 0.2±0.1       | 0.6±0.1     | 0.19 ±0.05  | 0.3±0.3     | 0.06±0.04   |
| carcass*         | 12±2          | 2.2±0.6     | 0.60 ±0.02  | 0.36±0.02   | 0.25±0.04   |

\* Data for stomach, small intestine, large intestine, and caecum are presented as %ID per whole sample with content. Data for carcass are presented as %ID for whole sample. The data are presented as average (n=4) values ± SD.

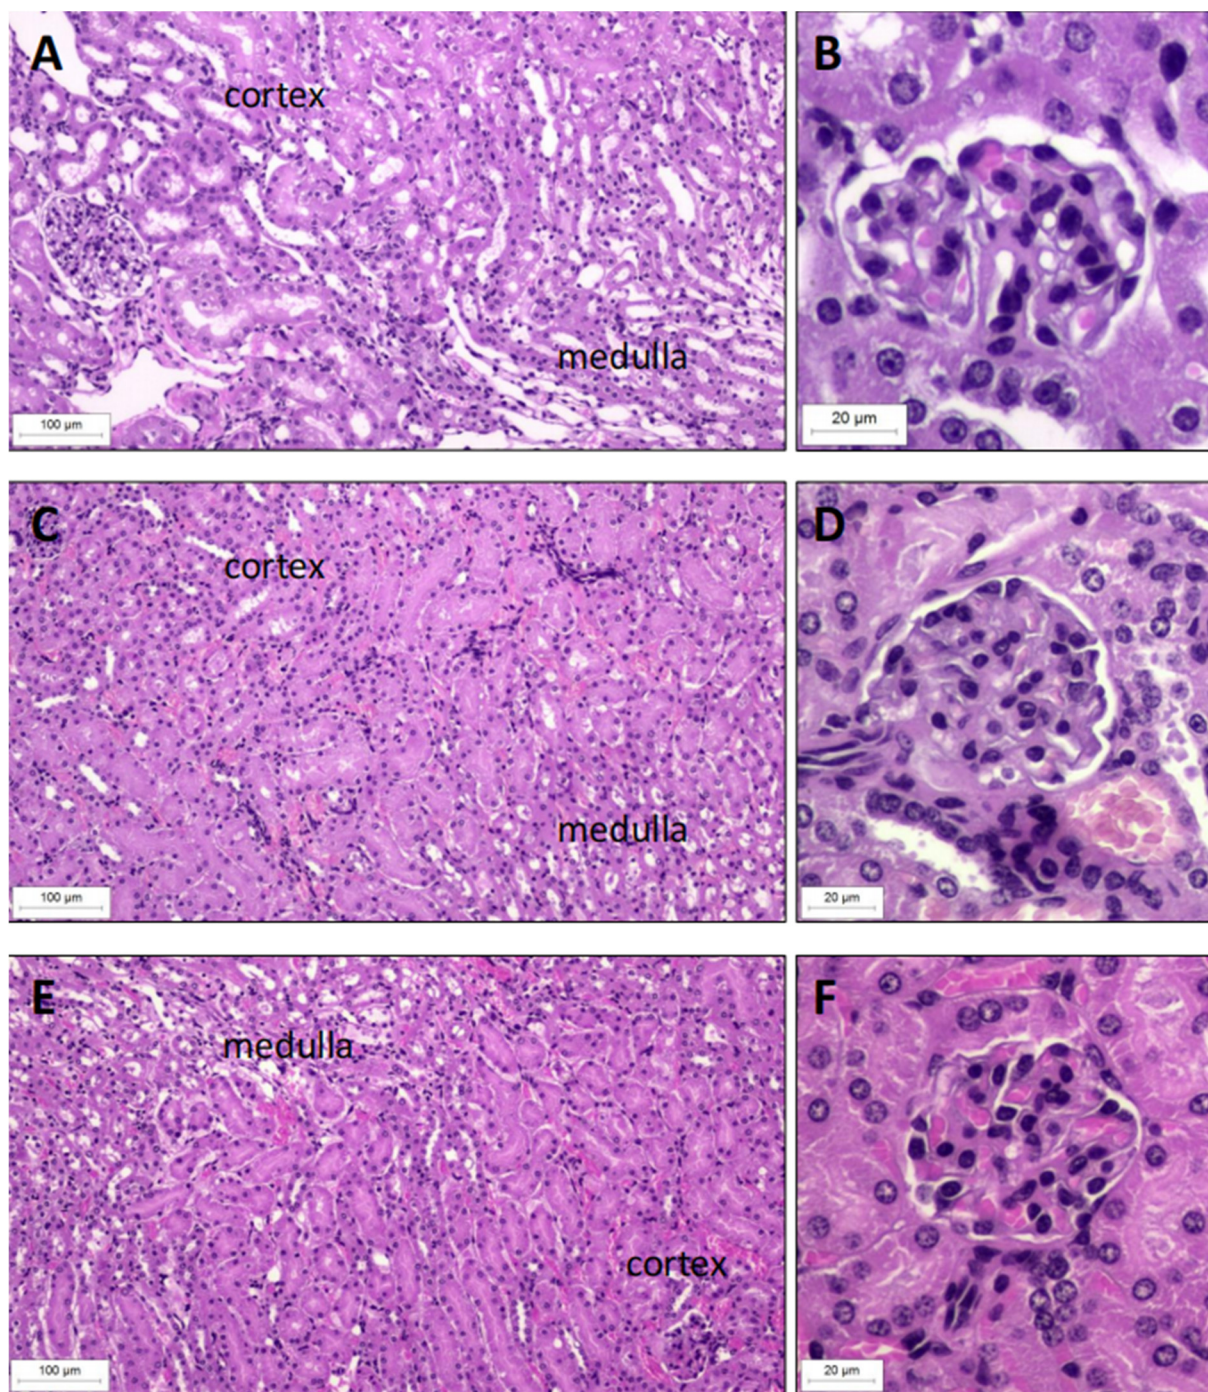

**Figure S2.** Results of pathological examination of kidneys. HE, 100x and 400x of kidney in mouse from  $^{188}\text{Re}$ -ZHER2:41071 group (A,B), vehicle group (C,D) and ZHER2:41071 group (E,F).



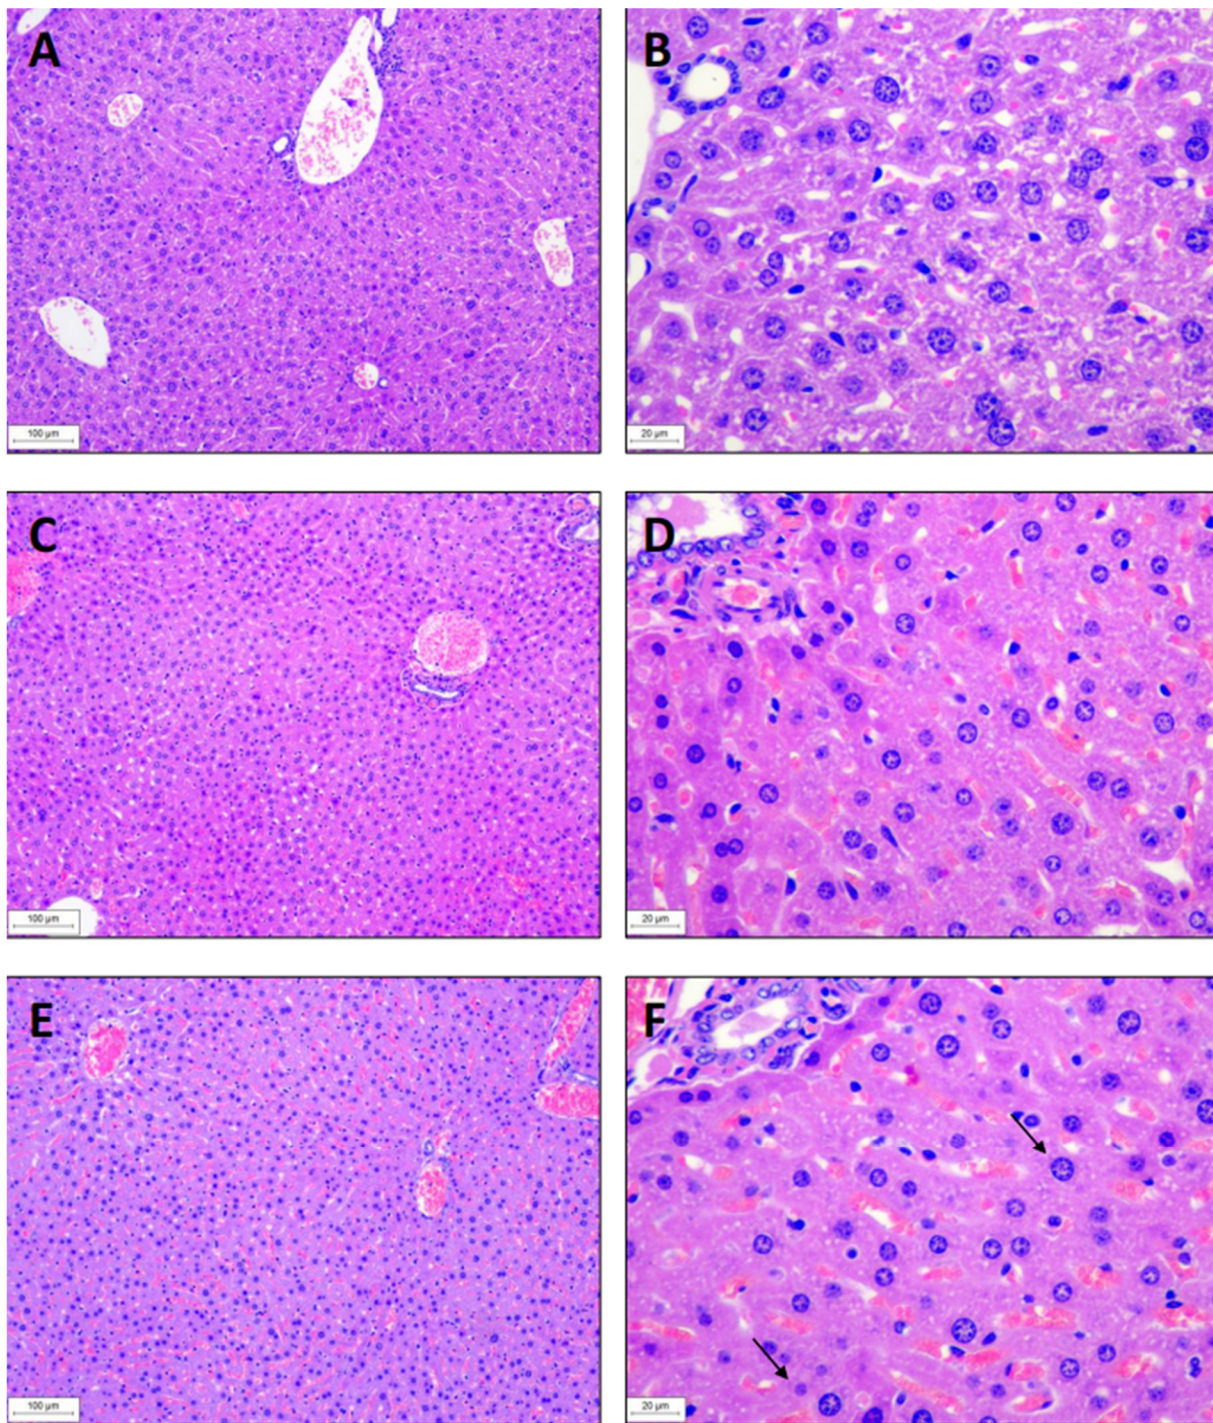

**Figure S3.** Results of pathological examination of livers. HE, 100x and 400x of liver in mouse from  $^{188}\text{Re}$ -ZHER2:41071 group (A,B), vehicle group (C,D) and ZHER2:41071 group (E,F). Arrows indicate a small and a large nucleus.
